# Supplementary material for: From Monoamine Oxidase Inhibition to Antiproliferative Activity: New Biological Perspectives for Polyamine Analogs
Source: MDPI journal article supplement (doi:10.3390/molecules28176329), 2023-08-29
Supplement: s1 [file s1]

## Supplementary Materials

# From Monoamine Oxidase Inhibition to Antiproliferative Activity: New Biological Perspectives for Polyamine Analogs

Giulia Nordio <sup>1,2</sup>, Francesco Piazzola <sup>1</sup>, Giorgio Cozza <sup>3</sup>, Monica Rossetto <sup>3</sup>, Manuela Cervelli <sup>4</sup>, Anna Minarini <sup>5</sup>, Filippo Basagni <sup>5</sup>, Elisa Tassinari <sup>6</sup>, Lisa Dalla Via <sup>1,2</sup>, Andrea Milelli <sup>6,\*</sup> and Maria Luisa Di Paolo <sup>3,\*</sup>

<sup>1</sup> Department of Pharmaceutical and Pharmacological Sciences, University of Padova, 35131 Padova, Italy; giulia.nordio.1@phd.unipd.it (G.N.); francesco.piazzola@studenti.unipd.it (F.P.)

<sup>2</sup> Consorzio Interuniversitario Nazionale per la Scienza e Tecnologia dei Materiali (INSTM), 50121 Firenze, Italy

<sup>3</sup> Department of Molecular Medicine, University of Padova, 35131 Padova, Italy; giorgio.cozza@unipd.it (G.C.); monica.rossetto@unipd.it (M.R.)

<sup>4</sup> Department of Science, University of Rome "Roma Tre", 00146 Rome, Italy; manuela.cervelli@uniroma3.it

<sup>5</sup> Department of Pharmacy and Biotechnology, Alma Mater Studiorum-University of Bologna, 40126 Bologna, Italy; anna.minarini@unibo.it (A.M.); filippo.basagni2@unibo.it (F.B.)

<sup>6</sup> Department for Life Quality Studies, Alma Mater Studiorum-University of Bologna, 47921 Rimini, Italy; elisa.tassinari9@unibo.it

\* Correspondence: andrea.milelli3@unibo.it (A.M.); marialuisa.dipaolo@unipd.it (M.L.D.P.)

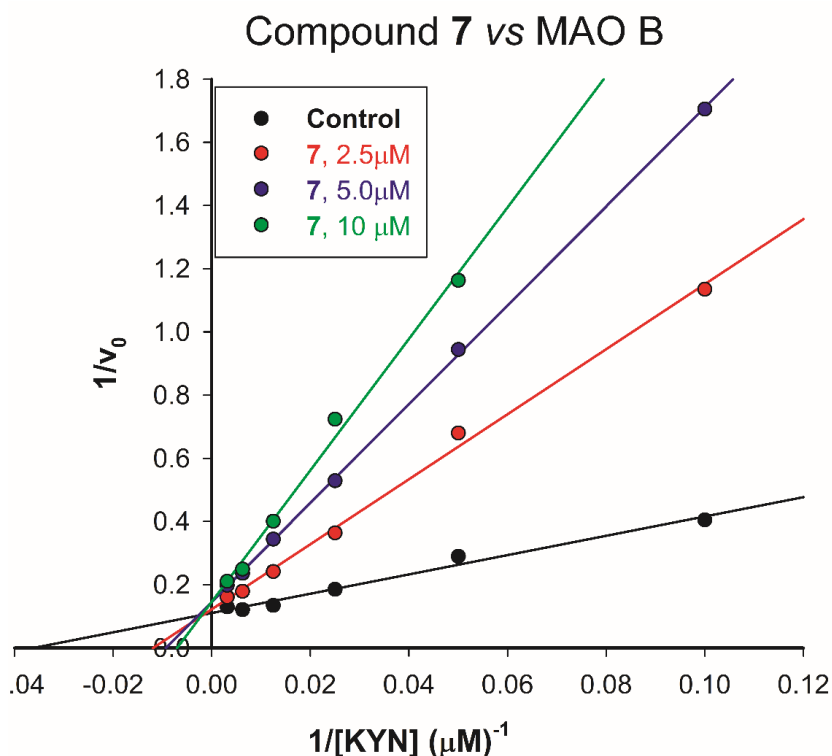

**Figure S1** Double reciprocal plots of MAO B activity in the presence of various concentrations of compound 7. Continuous lines are the results of the linear regression analysis of the plotted data ( $r > 0.99$ )
